# Supplementary material for: Effect of Organic and Conventional Production Methods on Fruit Yield and Nutritional Quality Parameters in Three Traditional Cretan Grape Varieties: Results from a Farm Survey
Source: PubMed Central journal article supplement (PMC7926479; doi:10.3390/foods10020476), 2021-02-22
Supplement: foods-10-00476-s001.pdf [file foods-10-00476-s001.pdf]

## Supplementary Materials

**Table S1.** Farm/orchard characteristics and agronomic parameters used for redundancy analyses (RDA; see Figures 1 and S1). Data were obtained via structured questionnaire based farmer surveys.

| Farm  | Farm Type    | Grape Variety | Vineyard Age | Soil Texture | Orchard      |
|-------|--------------|---------------|--------------|--------------|--------------|
|       |              |               | years        |              | Orientation* |
| 1     | Conventional | Kotsifali     | 18           | clay loam    | west         |
| 2     | Conventional | Kotsifali     | 20           | clay loam    | west         |
| 3     | Conventional | Kotsifali     | 16           | clay loam    | south        |
| 4     | Conventional | Kotsifali     | 13           | clay loam    | south east   |
| 5     | Conventional | Kotsifali     | 20           | clay loam    | west         |
| 6(a)  | Organic      | Kotsifali     | 21           | clay loam    | west         |
| 7(b)  | Organic      | Kotsifali     | 22           | clay loam    | west         |
| 8     | Organic      | Kotsifali     | 22           | sandy loam   | south        |
| 9     | Organic      | Kotsifali     | 17           | clay loam    | west         |
| 10    | Organic      | Kotsifali     | 7            | clay loam    | south        |
| 11    | Conventional | Vidiano       | 7            | clay loam    | south        |
| 12    | Conventional | Vidiano       | 4            | clay loam    | south        |
| 13    | Conventional | Vidiano       | 16           | clay loam    | south        |
| 14    | Conventional | Vidiano       | 5            | clay loam    | west         |
| 15    | Organic      | Vidiano       | 4            | clay loam    | west         |
| 16    | Organic      | Vidiano       | 10           | clay loam    | south        |
| 17    | Organic      | Vidiano       | 3            | sandy loam   | south        |
| 18    | Organic      | Vidiano       | 25           | clay loam    | south        |
| 19(a) | Conventional | Villana       | 18           | clay loam    | west         |
| 20(b) | Conventional | Villana       | 19           | clay loam    | south        |
| 21    | Conventional | Villana       | 20           | clay loam    | west         |
| 22    | Conventional | Villana       | 13           | clay loam    | south        |
| 23    | Organic      | Villana       | 21           | clay loam    | west         |
| 24    | Organic      | Villana       | 14           | clay loam    | west         |
| 25    | Organic      | Villana       | 20           | clay loam    | west         |
| 26    | Organic      | Villana       | 20           | clay loam    | west         |

\* direction the slope of the orchard is facing

**Table S1 cont..** Farm/orchard characteristics and agronomic parameters used for redundancy analyses (RDA; see Figures 1 and S1). Data were obtained via structured questionnaire based farmer surveys.

| Farm  | Farm Type    | Irrigation | Plant Density | Estimated total N, P K inputs from fertilisers |                                                |                                                | Type of fertiliser used |
|-------|--------------|------------|---------------|------------------------------------------------|------------------------------------------------|------------------------------------------------|-------------------------|
|       |              |            |               | N<br>kg ha <sup>-1</sup><br>year <sup>-1</sup> | K<br>kg ha <sup>-1</sup><br>year <sup>-1</sup> | P<br>kg ha <sup>-1</sup><br>year <sup>-1</sup> |                         |
| 1     | Conventional | dripping   | 300           | 110                                            | 150                                            | 150                                            | mineral                 |
| 2     | Conventional | no         | 300           | 33                                             | 40                                             | 40                                             | mineral                 |
| 3     | Conventional | dripping   | 300           | 4.3                                            | 13                                             | 0.109                                          | leonardite              |
| 4     | Conventional | no         | 220           | 110                                            | 150                                            | 150                                            | mineral                 |
| 5     | Conventional | no         | 400           | 400                                            | 160                                            | 0                                              | mineral                 |
| 6(a)  | Organic      | dripping   | 300           | 50                                             | 100                                            | 50                                             | sheep manure            |
| 7(b)  | Organic      | no         | 350           | 50                                             | 100                                            | 50                                             | sheep manure            |
| 8     | Organic      | no         | 220           | 84                                             | 108                                            | 36                                             | sheep manure            |
| 9     | Organic      | no         | 350           | 45                                             | 15                                             | 60                                             | grape waste<br>compost  |
| 10    | Organic      | dripping   | 300           | 70                                             | 90                                             | 30                                             | sheep manure            |
| 11    | Conventional | no         | 300           | 33                                             | 40                                             | 40                                             | mineral                 |
| 12    | Conventional | dripping   | 350           | 150                                            | 160                                            | 0                                              | mineral                 |
| 13    | Conventional | dripping   | 320           | 4.3                                            | 13                                             | 0.109                                          | leonardite              |
| 14    | Conventional | no         | 300           | 110                                            | 150                                            | 150                                            | mineral                 |
| 15    | Organic      | no         | 360           | 160                                            | 160                                            | 0                                              | mineral                 |
| 16    | Organic      | no         | 450           | 45                                             | 15                                             | 60                                             | grape waste<br>compost  |
| 17    | Organic      | dripping   | 260           | 0                                              | 0                                              | 0                                              | mineral                 |
| 18    | Organic      | no         | 350           | 70                                             | 90                                             | 30                                             | sheep manure            |
| 19(a) | Conventional | dripping   | 300           | 110                                            | 150                                            | 150                                            | mineral                 |
| 20(b) | Conventional | no         | 300           | 110                                            | 150                                            | 150                                            | mineral                 |
| 21    | Conventional | no         | 300           | 33                                             | 40                                             | 40                                             | mineral                 |
| 22    | Conventional | dripping   | 320           | 4.3                                            | 13                                             | 0.109                                          | leonardite              |
| 23    | Organic      | dripping   | 300           | 50                                             | 100                                            | 50                                             | sheep manure            |
| 24    | Organic      | no         | 220           | 84                                             | 108                                            | 36                                             | sheep manure            |
| 25    | Organic      | no         | 280           | 70                                             | 90                                             | 30                                             | sheep manure            |
| 26    | Organic      | no         | 350           | 45                                             | 15                                             | 60                                             | grape waste<br>compost  |

**Table S2.** Number of wine samples\* produced in different years (vintages) collected and analysed

| Year/vintage**                              | Red wine made from<br>Kotsifali grapes |              | White wine made from<br>Vidiano grapes |              |
|---------------------------------------------|----------------------------------------|--------------|----------------------------------------|--------------|
|                                             | Organic                                | Conventional | Organic                                | Conventional |
| 2009                                        | 1                                      | 1            |                                        |              |
| 2010                                        | 1                                      | 1            |                                        |              |
| 2011                                        | 2                                      | 2            | 1                                      |              |
| 2012                                        | 4                                      | 4            | 2                                      | 1            |
| 2013                                        | 2                                      | 2            | 2                                      | 2            |
| 2014                                        |                                        | 1            | 5                                      | 5            |
| <b>Total number of<br/>samples analysed</b> | <b>10</b>                              | <b>11</b>    | <b>10</b>                              | <b>8</b>     |

\*, a sample constitute a bottle or box (3 l or 5 l) of wine; \*\* if more than one sample was collected from a specific production year/vintage each sample was from a different winery.

**Table S3.** Interactions means  $\pm$  SE for the effects of variety and year/ production season on total antioxidant activity (DPPH) and anthocyanin concentrations in table grapes

| Parameter<br>assessed                                               | Factor 1<br>Variety | Factor 2<br>Year/ production season |                   |
|---------------------------------------------------------------------|---------------------|-------------------------------------|-------------------|
|                                                                     |                     | 2014                                | 2015              |
| <b>Antioxidant<br/>activity (DPPH)</b><br>$\mu\text{mol TE g}^{-1}$ | Kotsifali (red)     | 122 $\pm$ 1.0 a A                   | 108 $\pm$ 1.1 b A |
|                                                                     | Villana (white)     | 63 $\pm$ 0.6 a B                    | 55 $\pm$ 0.4 b B  |
|                                                                     | Vidiano (white)     | 61 $\pm$ 0.2 a B                    | 54 $\pm$ 0.4 b B  |
| <b>Anthocyanin<br/>concentrations</b><br>$\text{mg cyan/ kg}^{-1}$  | Kotsifali (red)     | 456 $\pm$ 50 a A                    | 313 $\pm$ 25 b A  |
|                                                                     | Villana (white)     | 8 $\pm$ 4 a B                       | 12 $\pm$ 2 a B    |
|                                                                     | Vidiano (white)     | 17 $\pm$ 6 a B                      | 27 $\pm$ 6 a B    |

For each parameter's assessed means labelled with the same lower case letter within the same row and capital letters within the same column are not significant different (General Linear Hypothesis test  $p < 0.05$ )

**Table S4.** Effect of, and interaction between, production system and year on concentrations of individual anthocyanins (*delphinidin-3-O-glucoside*, *cyanidin-3-O-glucoside*, *petunidin-3-O-glucoside*, *peonidin-3-O-glucoside*, *malvidin-3-O-glucoside*, *peonidin-3-O-(6''-p-coumaroyl)glucoside*, *malvidin-3-O-(6''-p-coumaroyl)glucoside* in table grapes of the red variety Kotsifali (2-factor ANOVA)

| Factor                                                                                                     | Delphinidin<br>3-O-glucoside | Cyanidin 3-O-<br>glucoside | Petunidin 3-O-<br>glucoside | Peonidin<br>3-O-glucoside | Malvidin<br>3-O-glucoside | Peonidin<br>3-O-p-coumaroyl<br>glucoside | Malvidin<br>3-O-p-coumaroyl-<br>glucoside |
|------------------------------------------------------------------------------------------------------------|------------------------------|----------------------------|-----------------------------|---------------------------|---------------------------|------------------------------------------|-------------------------------------------|
| <b>Year (Yr)</b>                                                                                           |                              |                            |                             |                           |                           |                                          |                                           |
| 2014 ( <i>n</i> =8)                                                                                        | 6.4 ± 1.7                    | 15.9 ± 3.8                 | 11.6 ± 2.3                  | 87 ± 13                   | 82 ± 10                   | 6.3 ± 1.1                                | 7.6 ± 2.1                                 |
| 2015 ( <i>n</i> =10)                                                                                       | 3.1 ± 0.6                    | 12.0 ± 3.4                 | 7.4 ± 0.9                   | 84 ± 18                   | 66 ± 5                    | 4.6 ± 1.6                                | 6.4 ± 4.1                                 |
| <b>Production system (PS)</b>                                                                              |                              |                            |                             |                           |                           |                                          |                                           |
| ORG ( <i>n</i> =9)                                                                                         | 4.1 ± 1.3                    | 14.9 ± 4.2                 | 8.9 ± 1.7                   | 95 ± 19                   | 72 ± 8                    | 4.5 ± 1.0                                | 4.5 ± 2.0                                 |
| CONV ( <i>n</i> =9)                                                                                        | 4.9 ± 1.3                    | 12.6 ± 2.9                 | 9.6 ± 1.7                   | 76 ± 14                   | 74 ± 7                    | 6.3 ± 1.8                                | 9.4 ± 4.4                                 |
| <b>ANOVA (<i>P</i>-values)</b>                                                                             |                              |                            |                             |                           |                           |                                          |                                           |
| <i>Main effects</i>                                                                                        |                              |                            |                             |                           |                           |                                          |                                           |
| Yr                                                                                                         | NS                           | NS                         | NS                          | NS                        | NS                        | NS                                       | NS                                        |
| PS                                                                                                         | NS                           | NS                         | NS                          | NS                        | NS                        | NS                                       | NS                                        |
| <i>Interaction</i>                                                                                         |                              |                            |                             |                           |                           |                                          |                                           |
| Yr : PS                                                                                                    | NS                           | NS                         | NS                          | NS                        | NS                        | NS                                       | NS                                        |
| The values presented as means±SE; Mean values are expressed as mg kg <sup>-1</sup> FW; NS, not significant |                              |                            |                             |                           |                           |                                          |                                           |

**Table S5.** Effect of, and interaction between, production system (organic [ORG] vs conventional [CONV]), and variety for the total phenolic content (TPC), total antioxidant activity (TAA) by DPPH /TEAC assays and total anthocyanin content (TAC) (expressed as cyanidin-3-glucoside [cyan] or malvidin-3-glucoside [mal] equivalents) in Kotsifali (red) and Vidiano (white) wine samples (2-factor ANOVA for TPC and TAA; 1-factor ANOVA for TAC)

| <b>Factors</b>                                          | TPC<br>mg GAE l <sup>-1</sup> | TAA (DPPH)<br>mM TE l <sup>-1</sup> | TAA (TEAC)<br>mM TE l <sup>-1</sup> | TAC<br>mg cyan l <sup>-1</sup> | TAC<br>mg mal l <sup>-1</sup> |
|---------------------------------------------------------|-------------------------------|-------------------------------------|-------------------------------------|--------------------------------|-------------------------------|
| <b>Production system (PS)</b>                           |                               |                                     |                                     |                                |                               |
| ORG ( <i>n</i> =20)                                     | 1486 ±211                     | 5.2 ±0.7                            | 4.3 ±0.2                            | 66 ±16                         | 69 ±17                        |
| CONV ( <i>n</i> =20)                                    | 1478 ±224                     | 5.1 ±0.7                            | 4.1 ±0.3                            | 109 ±11                        | 115 ±12                       |
| <b>Main grape variety (Va)<br/>used for wine-making</b> |                               |                                     |                                     |                                |                               |
| Kotsifali (100%) ( <i>n</i> =12)                        | 2279 ± 70 <b>a</b>            | 7.8 ±0.2 <b>a</b>                   | 5.2 ±0.002 <b>a</b>                 | 92 ±16                         | 97 ±17                        |
| Kotsifali (70%) ( <i>n</i> =10)                         | 2333 ±159 <b>a</b>            | 8.0 ±0.5 <b>a</b>                   | 5.2 ±0.002 <b>a</b>                 | 83 ±14                         | 87 ±14                        |
| Vidiano (100%) ( <i>n</i> =14)                          | 504 ± 26 <b>b</b>             | 1.9 ±0.3 <b>b</b>                   | 3.2 ±0.20 <b>b</b>                  | ND                             | ND                            |
| Vidiano (70%) ( <i>n</i> =4)                            | 389 ± 7 <b>b</b>              | 1.6 ±0.5 <b>b</b>                   | 2.8 ±0.33 <b>b</b>                  |                                |                               |
| <b>ANOVA (P-values)</b>                                 |                               |                                     |                                     |                                |                               |
| <i>Main effects</i>                                     |                               |                                     |                                     |                                |                               |
| PS                                                      | NS                            | NS                                  | NS                                  | <b>0.036</b>                   | <b>0.036</b>                  |
| Va                                                      | <b>&lt;0.0001</b>             | <b>&lt;0.0001</b>                   | <b>0.0001</b>                       |                                |                               |
| <i>Interaction</i>                                      |                               |                                     |                                     |                                |                               |
| PS : Va                                                 | NS                            | NS                                  | NS                                  |                                |                               |

The values presented as means ±SE; means with same lower case letter within the same column are not significant different (General Linear Hypothesis test; *p*<0.05); NS, not significant; ND, not determined.

**Table S6.** Effect of production system (organic [ORG] vs conventional [CONV]) on concentrations of individual anthocyanins (delphinidin-3-O-glucoside, cyanidin-3-O-glucoside, petunidin-3-O-glucoside, peonidin-3-O-glucoside, malvidin-3-O-glucoside, peonidin-3-O-(6''-p-coumaroyl)glucoside, malvidin-3-O-(6''-p-coumaroyl)glucoside) in wines made from grapes of the red variety Kotsifali (1-factor ANOVA)

| <b>Factor</b>                 | Delphinidin 3-<br>O-glucoside | Cyanidin 3-<br>O-glucoside | Petunidin 3-<br>O-glucoside | Peonidin 3-<br>O-glucoside | Malvidin 3-<br>O-glucoside | Malvidin 3-O-p-<br>coumaroylglucoside |
|-------------------------------|-------------------------------|----------------------------|-----------------------------|----------------------------|----------------------------|---------------------------------------|
| <b>Production system (PS)</b> |                               |                            |                             |                            |                            |                                       |
| ORG ( <i>n</i> =7)            | 1.02 ±0.55                    | 0.21 ±0.12                 | 1.13 ±0.67                  | 1.36 ±0.74                 | 7.01 ±4.15                 | 0.58 ±0.36                            |
| CONV ( <i>n</i> =6)           | 1.00 ±0.23                    | 0.25 ±0.04                 | 1.31 ±0.32                  | 1.92 ±0.47                 | 10.88 ±3.15                | 0.81 ±0.26                            |
| <b>ANOVA p values</b>         |                               |                            |                             |                            |                            |                                       |
| PS                            | NS                            | NS                         | NS                          | NS                         | NS                         | NS                                    |

The values presented as means ±SE; Mean values are expressed as mg kg<sup>-1</sup> FW; NS, not significant

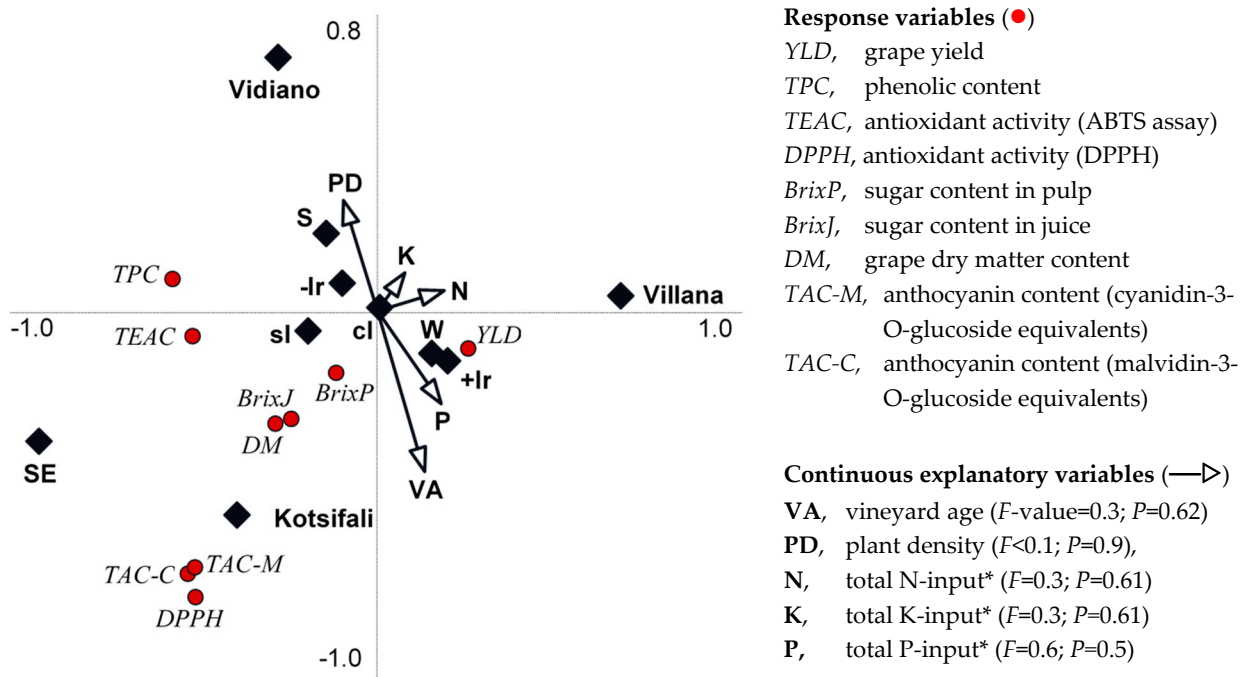

**Figure 2.** Biplot derived from the redundancy analysis showing the relationship between variety, agronomic, and orchard site and soil explanatory variables/drivers and grape yield and quality parameters. Eigenvalues were 32.5% and 8.6% for Axis 1 and 2 respectively.

**Fixed explanatory variables (◆):**

- (a) variety: **Vil**, Villana ( $F$ =17.1,  $P$ =0.002); **Vid**, Vidiano ( $F$ =5.7,  $P$ =0.024); **Kot**, Kotsifali ( $F$ =5.7;  $P$ =0.024)
- (b) irrigation: **+Ir**, with drip irrigation ( $F$ =1.3,  $P$ =0.31); **-Ir**, without drip irrigation ( $F$ =1.3,  $P$ =0.31)
- (c) orchard orientation, facing: **W**, west ( $F$ =0.9,  $P$ =0.36); **S**, south ( $F$ =1.0,  $P$ =0.31); **SE**, south east ( $F$ =1.0,  $P$ =0.31)
- (d) soil texture: **cl**, clay loam ( $F$ =0.2,  $P$ =0.74); **sl**, sandy loam ( $F$ =0.2,  $P$ =0.74).

\*, from mineral and/or organic fertilizer;
